# Supplementary material for: Highly active Ni–Fe double hydroxides as anode catalysts for electrooxidation of urea
Source: Royal Society of Chemistry journal article supplement (doi:10.1039/c6nj04060h), 2017-01-01
Supplement: c6nj04060h1.pdf [file c6nj04060h1.pdf]

# New Journal of Chemistry

## Supporting Information

of

### Highly active Ni-Fe double hydroxides as anode catalysts for electrooxidation of urea

Wei Xu <sup>a,b</sup>, Dongwei Du <sup>a</sup>, Rong Lan <sup>a</sup>, John Humphreys <sup>a</sup>, Zucheng Wu <sup>b</sup> and Shanwen Tao <sup>a,c\*</sup>

<sup>a</sup> School of Engineering, University of Warwick, Coventry CV4 7AL, UK

<sup>b</sup> Department of Environmental Engineering, State Key Laboratory of Clean Energy Utilization,  
Zhejiang University, Hangzhou 100044, Zhejiang, China

<sup>c</sup> Department of Chemical Engineering, Monash University, Clayton, Victoria 3800, Australia

Table S1. A list of anode catalysts with their catalytic activities for urea electrooxidation.

| catalysts                                          | test conditions                                                                 | catalytic activities                       | references                               |
|----------------------------------------------------|---------------------------------------------------------------------------------|--------------------------------------------|------------------------------------------|
| NiFe DH/CFC                                        | chronoamperometric analysis at 0.5 V vs. Ag/AgCl in 1 M NaOH + 0.33 M urea      | ~95 mA cm <sup>-2</sup> mg <sup>-1</sup>   | this work                                |
| Ni(OH) <sub>2</sub> /CFC                           | chronoamperometric analysis at 0.5 V vs. Ag/AgCl in 1 M NaOH + 0.33 M urea      | ~8 mA cm <sup>-2</sup> mg <sup>-1</sup>    | this work                                |
| Ni(OH) <sub>2</sub> nanoribbons                    | chronoamperometric analysis at 0.5 V vs. Hg/HgO in 5 M KOH + 0.33 M urea        | ~3 mA cm <sup>-2</sup> mg <sup>-1</sup>    | Wang <i>et al.</i> <sup>[S11]</sup>      |
| Ni(OH) <sub>2</sub> nanotubes/NF                   | chronoamperometric analysis at 0.5 V vs. SCE in 1 M KOH + 0.33 M urea           | ~55 mA cm <sup>-2</sup> mg <sup>-1</sup>   | Ji <i>et al.</i> <sup>[S2]</sup>         |
| porous Ni/carbon sponge                            | chronoamperometric analysis at 0.45 V vs. Ag/AgCl in 5 M NaOH + 0.1 M urea      | ~100 mA cm <sup>-2</sup>                   | Ye <i>et al.</i> <sup>[S3]</sup>         |
| mesoporous NiO/NF                                  | chronoamperometric analysis at 0.5 V vs. SCE in 1 M KOH + 0.33 M urea with stir | ~300 mA cm <sup>-2</sup> mg <sup>-1</sup>  | Wu <i>et al.</i> <sup>[S4]</sup>         |
| LaNiO <sub>3</sub>                                 | chronoamperometric analysis at 0.45 V vs. Hg/HgO in 5 M KOH + 0.33 M urea       | reduce from 600 to 150 mA mg <sup>-1</sup> | Forslund <i>et al.</i> <sup>[S5]</sup>   |
| NiMn/carbon nanofibers                             | chronoamperometric analysis at 0.6 V vs. Ag/AgCl in 1 M KOH + 2 M urea          | ~0.16 mA cm <sup>-2</sup> mg <sup>-1</sup> | Barakat <i>et al.</i> <sup>[S6]</sup>    |
| Ni <sub>1.5</sub> Mn <sub>1.5</sub> O <sub>4</sub> | chronoamperometric analysis at 0.5 V vs. Ag/AgCl in 1 M KOH + 0.33 M urea       | ~18 mA cm <sup>-2</sup>                    | Periyasamy <i>et al.</i> <sup>[S7]</sup> |
| Ni(OH) <sub>2</sub> nanocup                        | chronoamperometric analysis at 0.41 V vs. SCE in 1 M KOH + 0.33 M urea          | ~33 mA cm <sup>-2</sup> mg <sup>-1</sup>   | Wu <i>et al.</i> <sup>[S8]</sup>         |
| Ni nanowire                                        | chronoamperometric analysis at 0.55 V vs. Hg/HgO in 1 M KOH + 0.33 M urea       | reduce from 15 to 7 mA cm <sup>-2</sup>    | Yan <i>et al.</i> <sup>[S9]</sup>        |
| Ni-WC/C nanocluster                                | chronoamperometric analysis at 0.5 V vs. Hg/HgO in 1 M KOH + 0.33 M urea        | ~100 mA cm <sup>-2</sup> mg <sup>-1</sup>  | Wang <i>et al.</i> <sup>[S10]</sup>      |
| Ni nanowire                                        | chronoamperometric analysis at 0.5 V vs. Ag/AgCl in 5 M KOH + 0.33 M urea       | ~60 mA cm <sup>-2</sup>                    | Guo <i>et al.</i> <sup>[S11]</sup>       |
| NiCo nanowires                                     | chronoamperometric analysis at 0.55 V vs. Hg/HgO in 1 M KOH + 0.33 M urea       | ~6 mA cm <sup>-2</sup>                     | Yan <i>et al.</i> <sup>[S12]</sup>       |

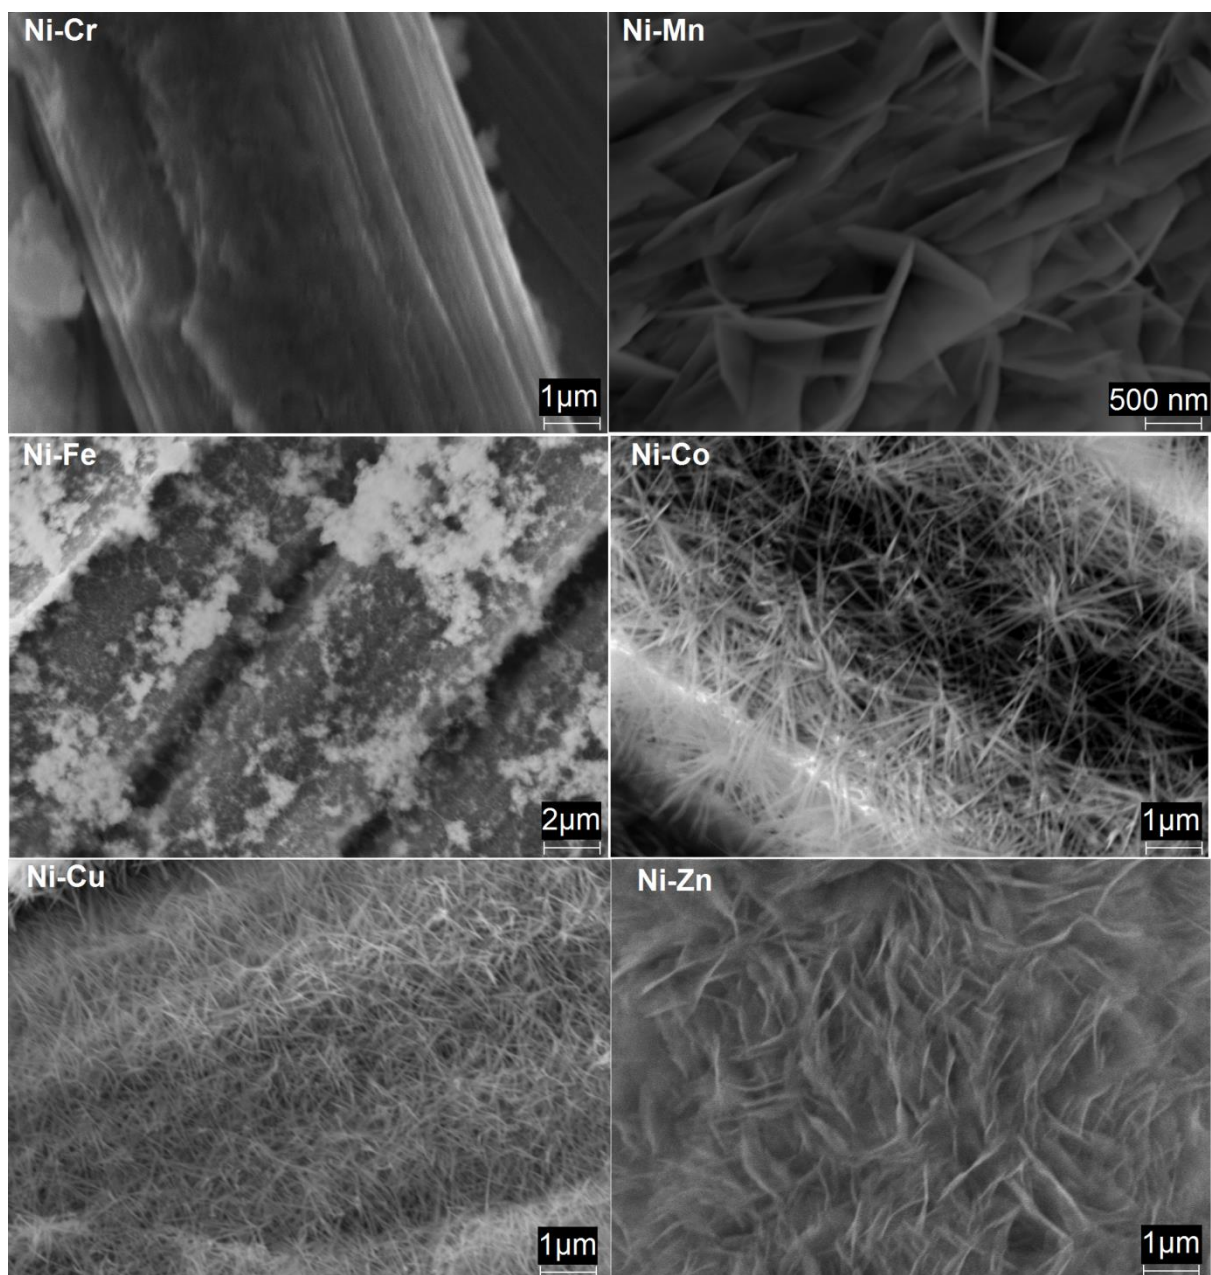

Figure S1. SEM images of Ni-Cr, Ni-Mn, Ni-Fe, Ni-Co, Ni-Cu and Ni-Zn double hydroxides on CFC.

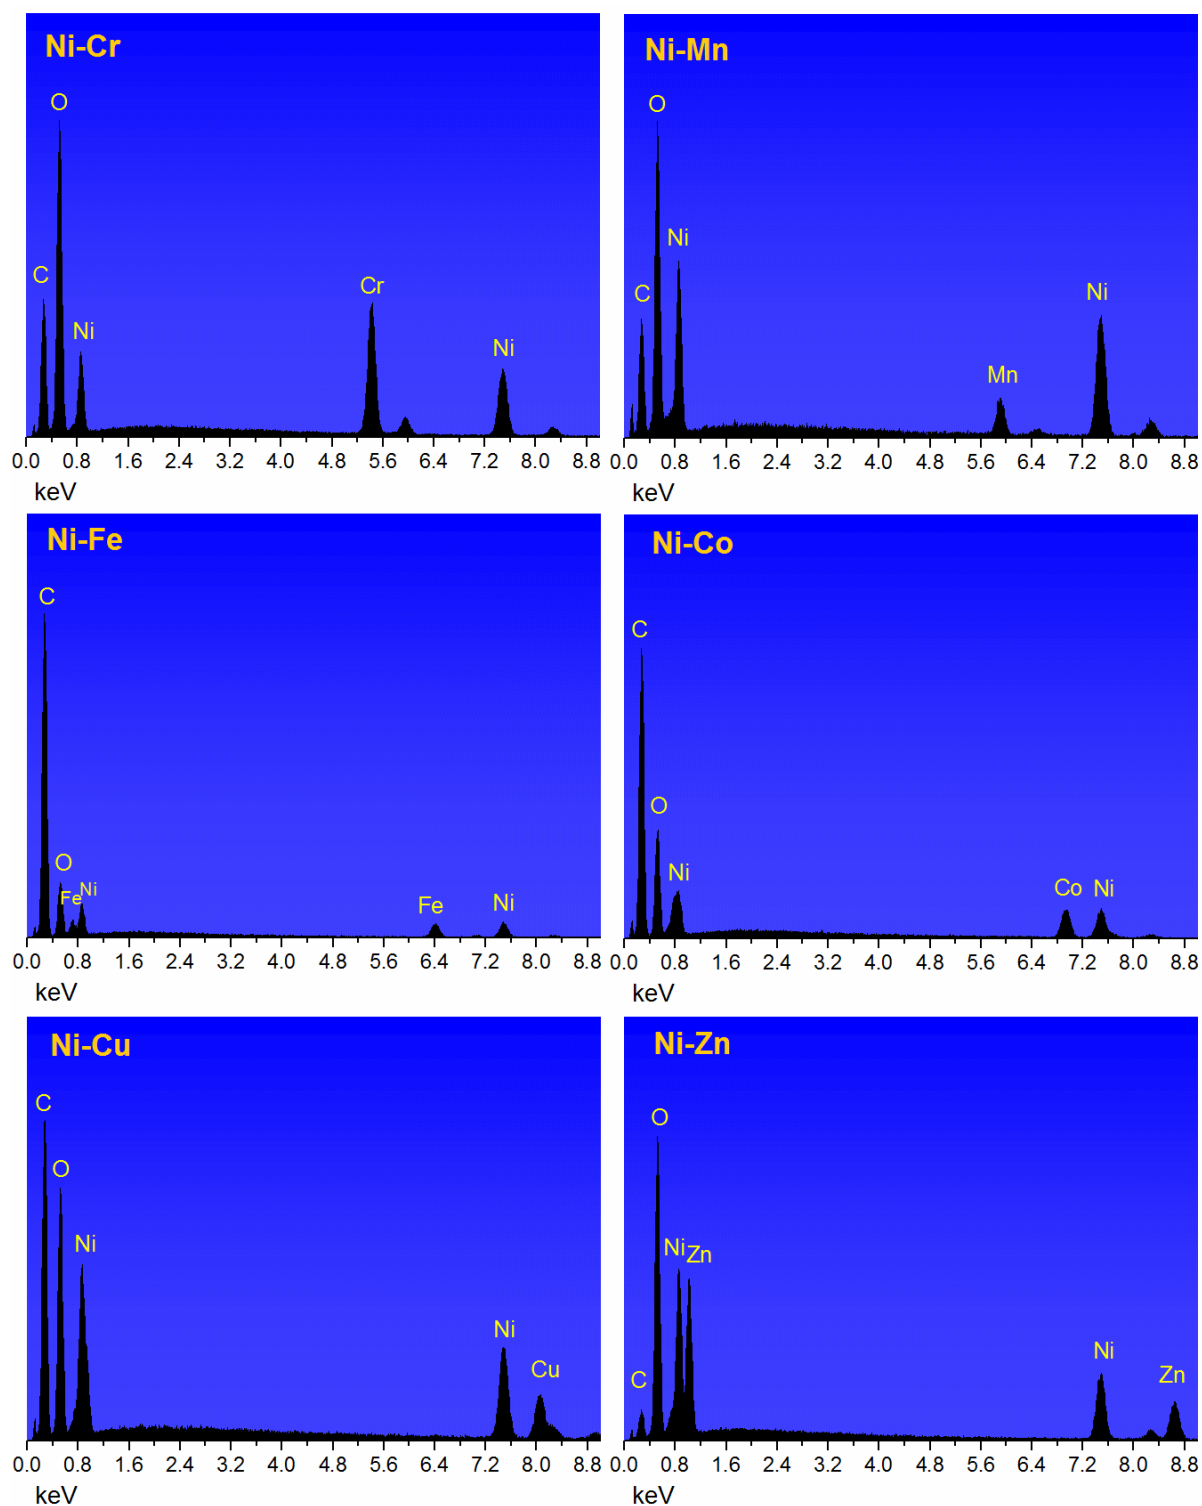

Figure S2. Energy dispersive spectroscopy (EDS) of Ni-Cr, Ni-Mn, Ni-Fe, Ni-Co, Ni-Cu and Ni-Zn double hydroxides on CFC.

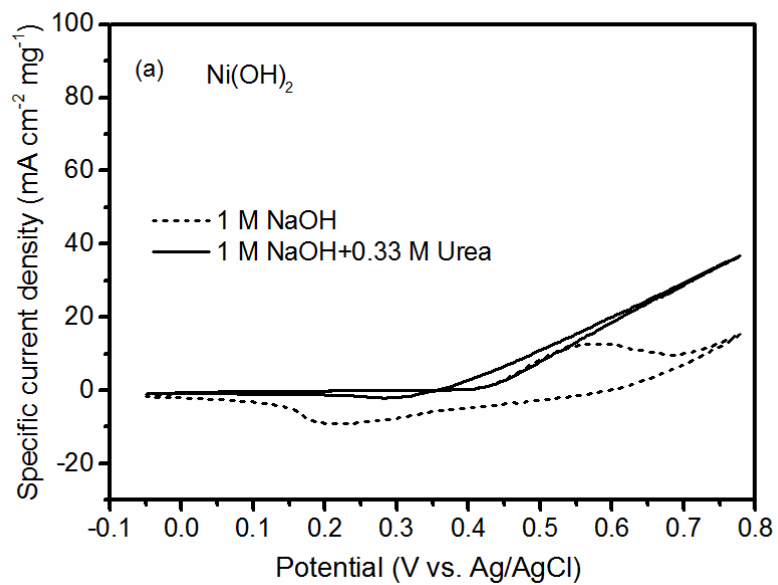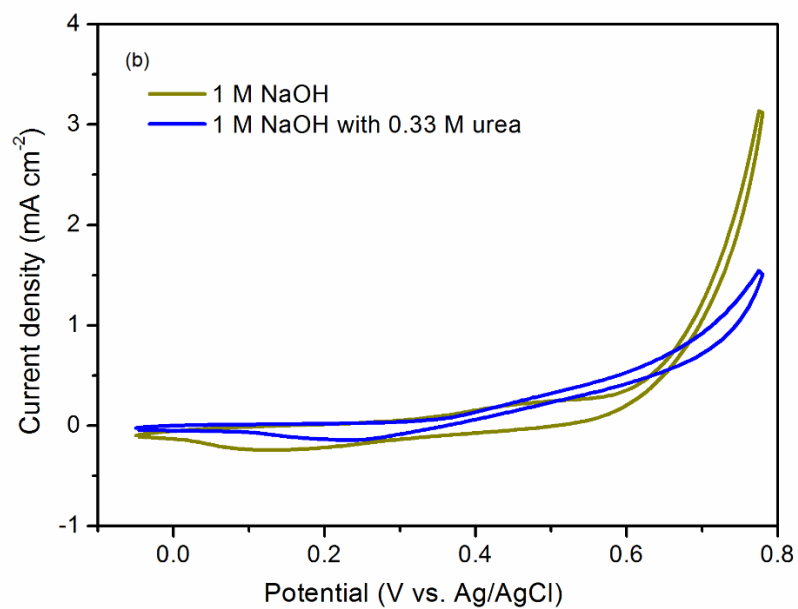

Figure S3. CVs of (a) Ni hydroxide on CFC and (b) bare CFC in 1 M NaOH with and without 0.33 M urea at scan rate of  $25 \text{ mV s}^{-1}$ .

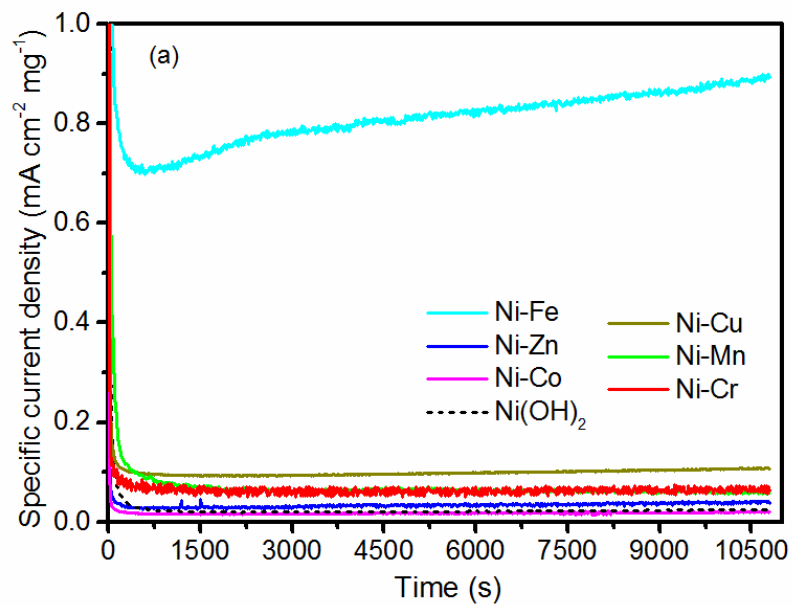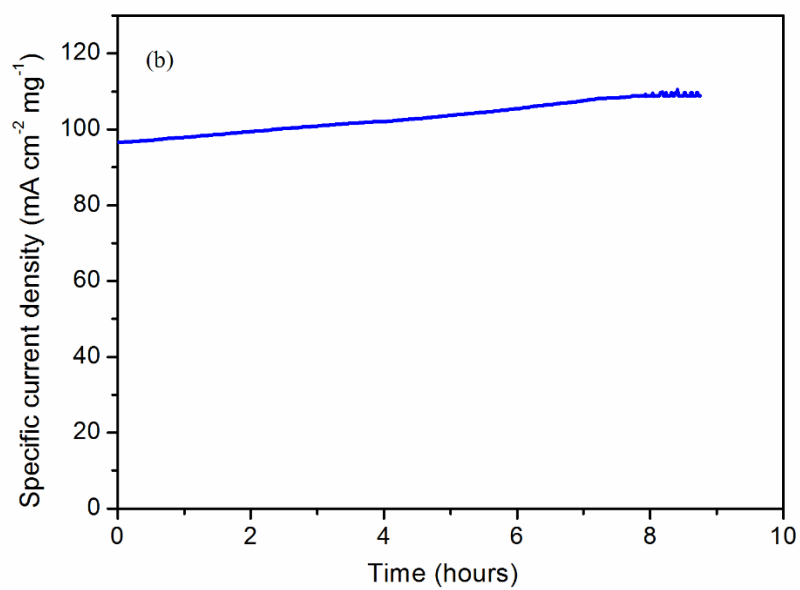

Figure S4. Chronoamperometric analysis of (a) Ni-M double hydroxides and Ni(OH)<sub>2</sub> on CFC in 1.0 M NaOH; (b) Ni<sub>0.6</sub>Fe<sub>0.4</sub> DH in 1.0 M NaOH + 0.33 M urea at 0.5 V (vs. Ag/AgCl).

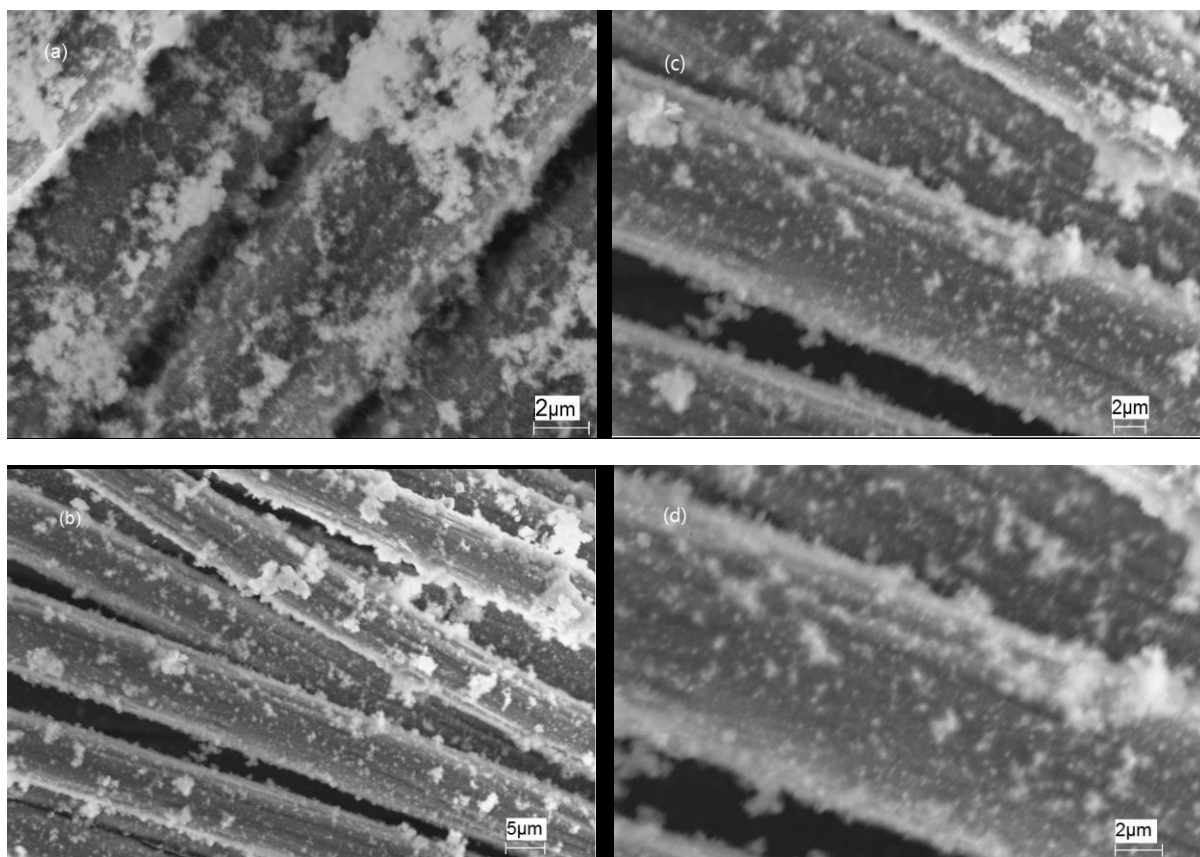

Figure S5. SEM images of (a)  $\text{Ni}_{0.5}\text{Fe}_{0.5}$  DH; (b)  $\text{Ni}_{0.6}\text{Fe}_{0.4}$  DH; (c)  $\text{Ni}_{0.7}\text{Fe}_{0.3}$  DH; (d)  $\text{Ni}_{0.8}\text{Fe}_{0.2}$  DH.

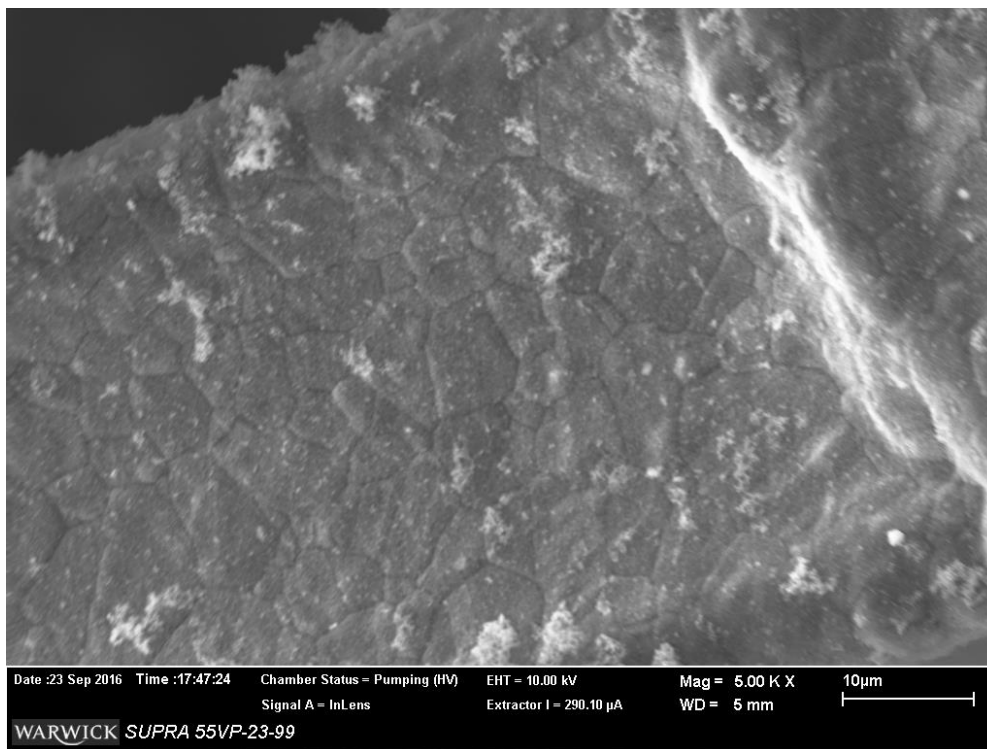

Figure S6. SEM images of Ni-Fe double hydroxides on NF (NiFe/NF).



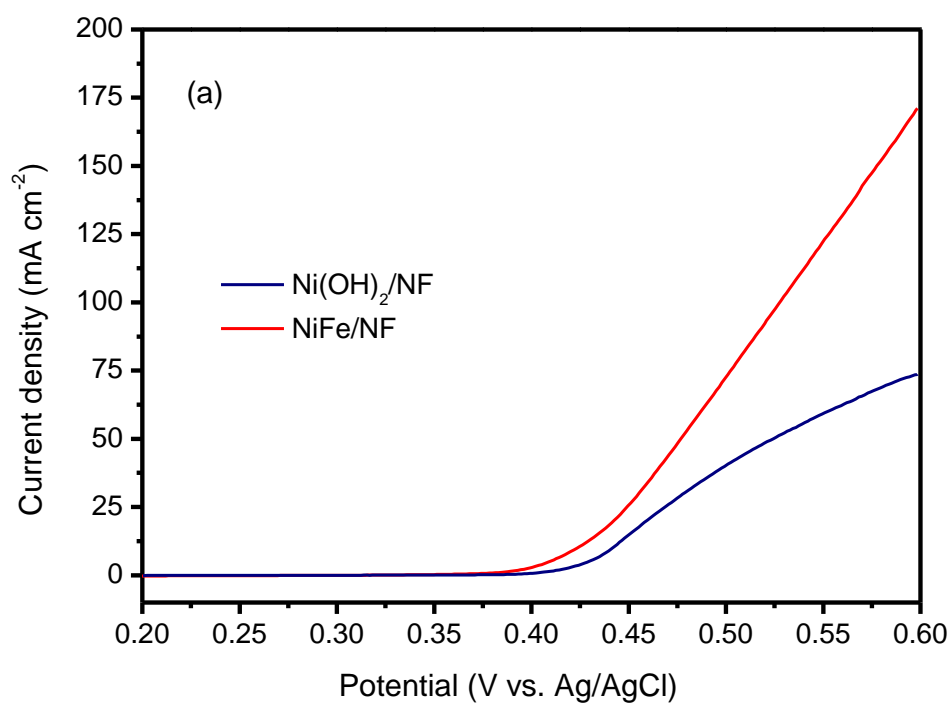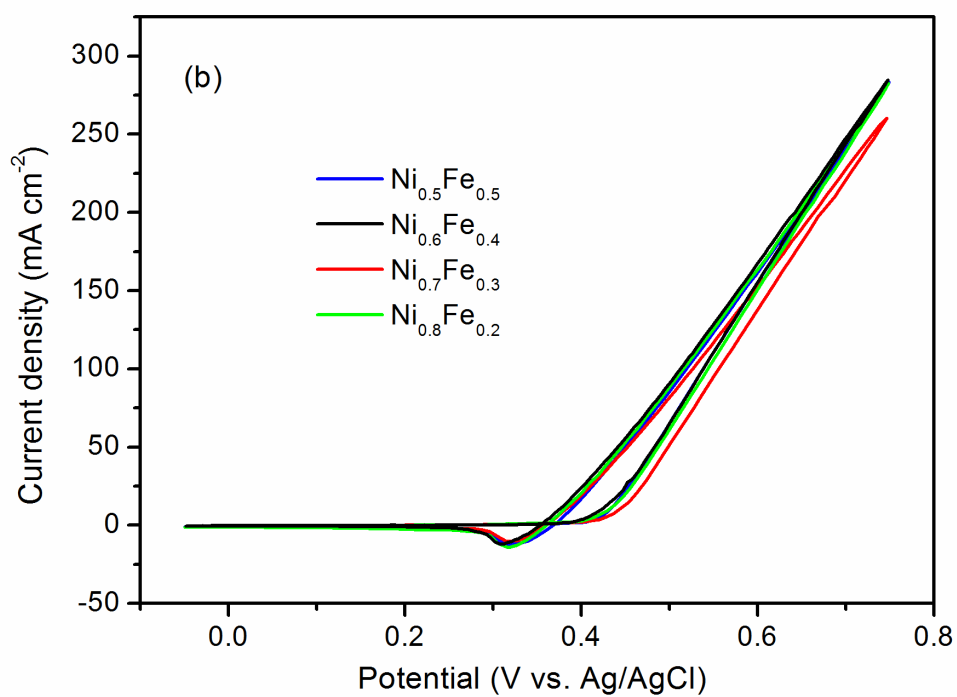

Figure S7. (a) LSVs of  $\text{Ni(OH)}_2/\text{NF}$  and  $\text{NiFe}/\text{NF}$  in 1 M NaOH with 0.33 M urea at scan rate of  $2 \text{ mV s}^{-1}$ ; (b) CVs of NiFe hydroxides grown on NF using different atom ratios in precursor solution. Electrolyte: 1 M NaOH with 0.33 M urea. Scan rate:  $25 \text{ mV s}^{-1}$

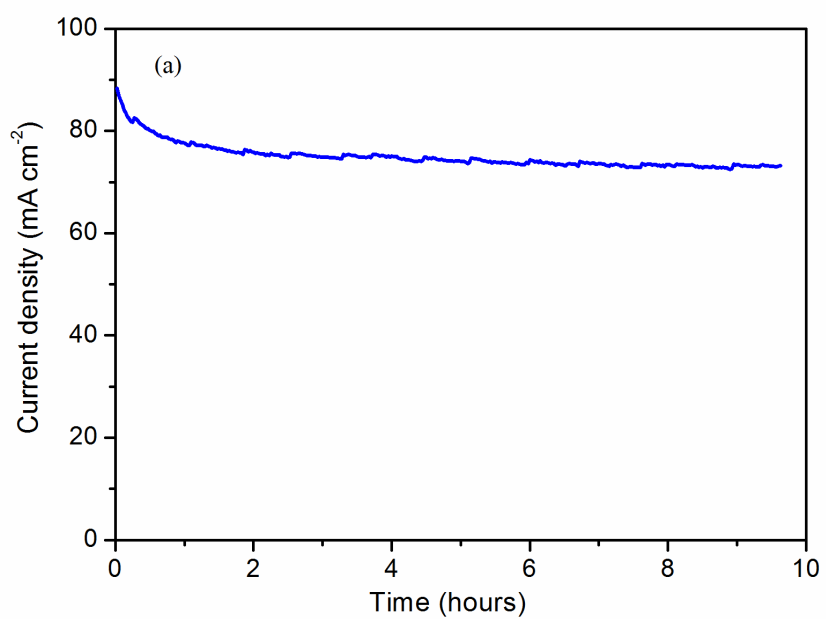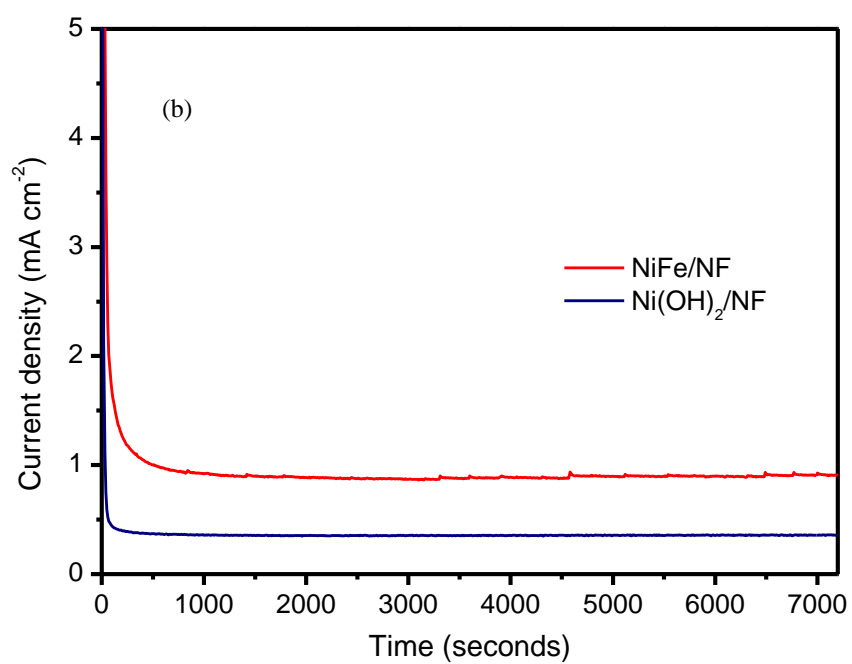

Figure S8. Chronoamperometric analysis at 0.5 V (vs. Ag/AgCl) of (a) NiFe/NF in 1.0 M NaOH+0.33 M urea; (b)  $\text{Ni(OH)}_2/\text{NF}$  and NiFe/NF in 1.0 M NaOH.

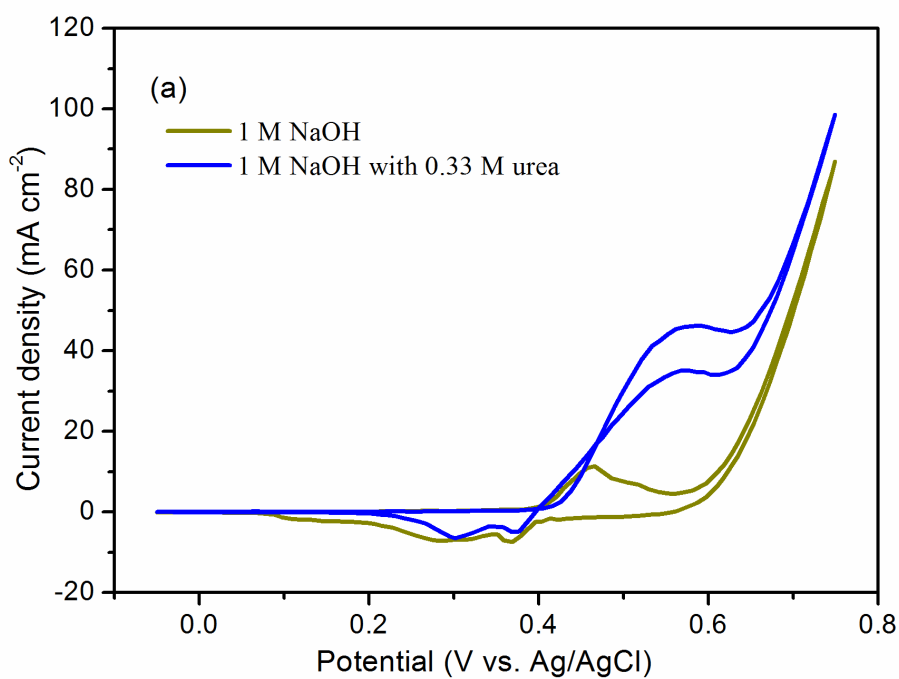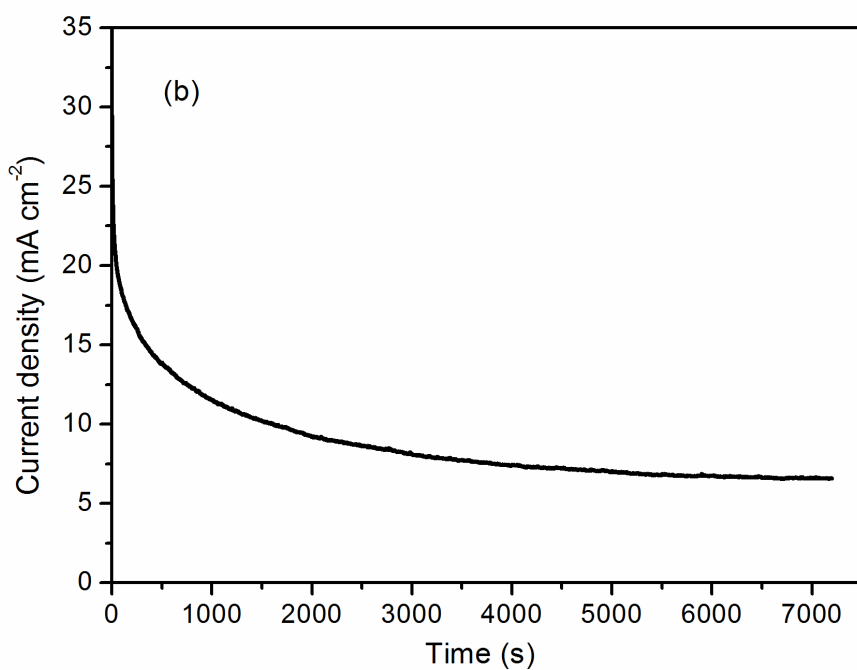

Figure S9. (a) CVs of bare Ni foam in 1 M NaOH with and without 0.33 M urea at scan rate of  $25 \text{ mV s}^{-1}$ ; (b) Chronoamperometric analysis of bare Ni foam recorded at 0.5 V (vs. Ag/AgCl) in 1.0 M NaOH with 0.33 M urea.

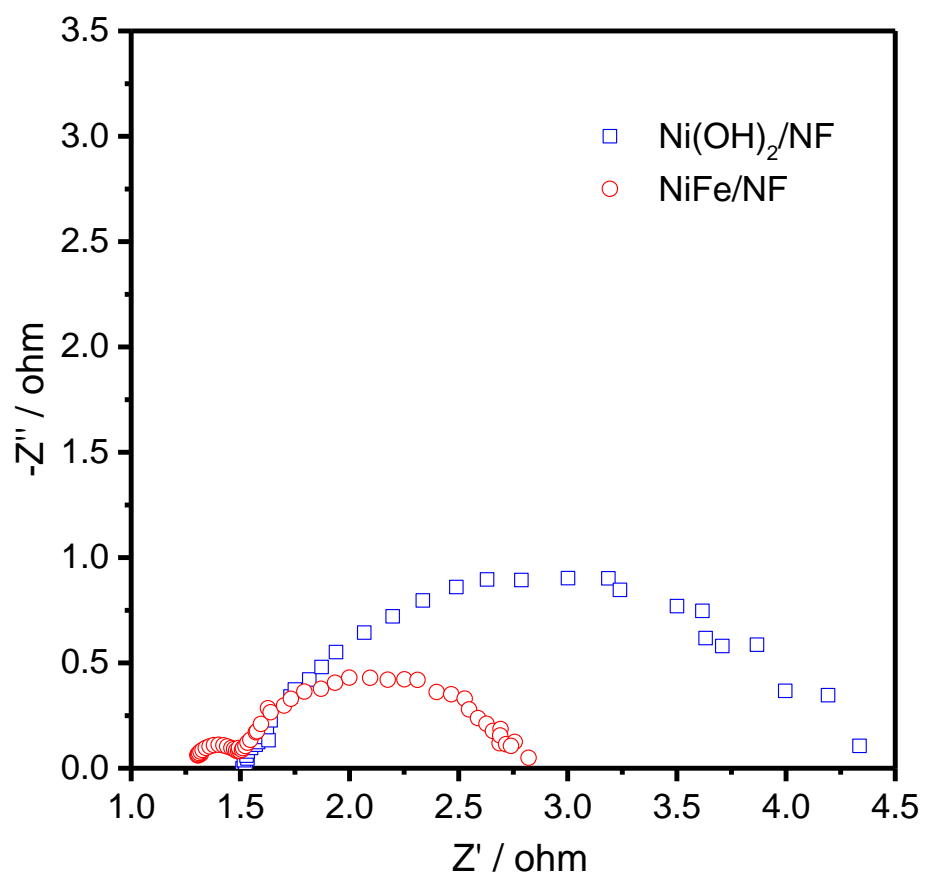

Figure S10. Nyquist plots of Ni(OH)<sub>2</sub>/NF and NiFe/NF recorded at 0.5 V (vs. Ag/AgCl) in 1.0 M NaOH with 0.33 M urea.

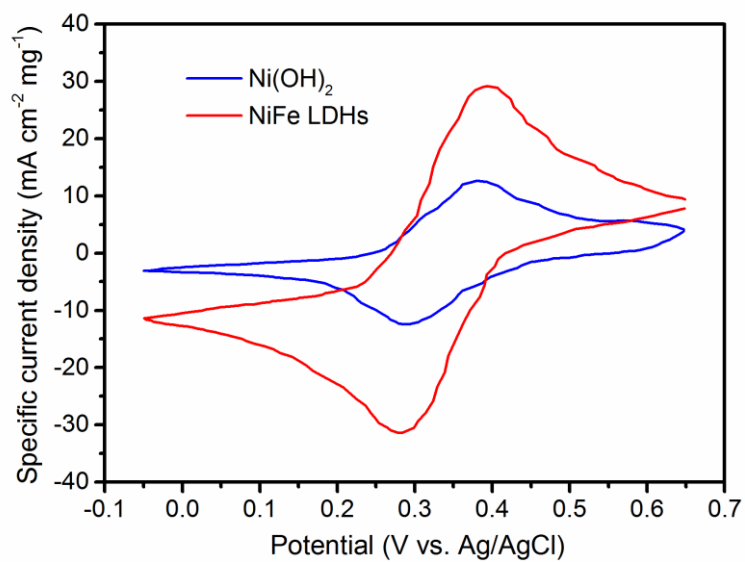

Figure S11. CV plots of NiFe DH and Ni(OH)<sub>2</sub> catalysts in 10 mM K<sub>3</sub>[Fe(CN)<sub>6</sub>] with 1 M KCl at a scan rate of 50mV s<sup>-1</sup>.

## References

- [S1] D. Wang, W. Yan, S. H. Vijapur, G. G. Botte, *J. Power Source*, 2012, **217**, 498-502.
- [S2] R.Y. Ji, D. S. Chan, J.J. Jow, M. S. Wu, *Electrochem. Commun.*, 2013, **29**, 21-24.
- [S3] K. Ye, D. Zhang, F. Guo, K.Cheng, G. Wang, D. Cao, *J. Power Source*, 2015, **283**, 408-415.
- [S4] M. S. Wu, G. W. Lin, R. S. Yang, *J. Power Source*, 2014, **272**, 711-718.
- [S5] R. P. Forslund, J. T. Mefford, W. G. Hardin, C. T. Alexander, K. P. Johnston, K. J. Stevenson, *ACS Catal.*, 2016, **6**, 5044–5051.
- [S6] N. A.M. Barakat, M. H. El-Newehy, A. S. Yasin, Z. K. Ghouri, S. S. Al-Deyab, *Appl. Catal. A Gen.*, 2016, **510**, 180-188.
- [S7] S. Periyasamy, P. Subramanian, E. Levi, D. Aurbach, A. Gedanken, A.Schechter, *ACS Appl. Mater. Interfaces*, 2016, **8**, 12176–12185.
- [S8] M. S. Wu, R. Y. Ji, Y. R. Zheng, *Electrochim. Acta*, 2014, **144**, 194-199.
- [S9] W. Yan, D. Wang, L. A. Diaz, G. G. Botte, *Electrochim. Acta*, 2014, **134**, 266-271.
- [S10] L. Wang, M. Li, Z. Huang, Y. Li, S. Qi, C. Yi, B. Yang, *J. Power Sources*, 2014, **264**, 282-289.
- [S11] F. Guo, K. Ye, K. Cheng, G. Wang, D. Cao, *J. Power Sources*, 2015, **278**, 562-568.
- [S12] W. Yan, D. Wang, G. G. Botte, *J. Appl. Electrochem.*, 2015, **45**, 1217–1222.
